# Supplementary material for: Treatment Outcomes of Adolescents Compared to Younger Pediatric Patients with Acute Myeloid Leukemia: Do They Need a Special Approach?
Source: MDPI journal article supplement (doi:10.3390/cancers16061145), 2024-03-14
Supplement: s1 [file s1]

**Figure S1. The details of therapeutic regimens according to AML-BFM-2012 Registry and AML-BFM-2019 protocols**

**AML-BFM 2012 Registry**

|                |     |     |          |     |             |             |
|----------------|-----|-----|----------|-----|-------------|-------------|
| SRG<br>inv(16) | AIE | AI  | hAM      | HAE | Maintenance |             |
| SRG            | AIE | HAM | AI       | hAM | HAE         | Maintenance |
| IRG            | AIE | HAM | AI/2-CDA | hAM | HAE         | Maintenance |
| HRG            | AIE | HAM | AI/2-CDA | hAM | alloHSCT    |             |

**AML-BFM 2019**

|                |     |     |     |     |             |             |
|----------------|-----|-----|-----|-----|-------------|-------------|
| SRG<br>inv(16) | AIE | AI  | hAM | HAE | Maintenance |             |
| SRG            | AIE | HAM | AI  | hAM | HAE         | Maintenance |
| IRG            | AIE | HAM | AI  | hAM | HAE         | Maintenance |
| HRG            | AIE | HAM | AI  | hAM | alloHSCT    |             |

**Induction phases:**

**AIE:** cytarabine 100 mg/m<sup>2</sup>/day continuous infusion on days 1 and 2, followed by 30 min infusion every 12 h on days 3–8; idarubicin 12 mg/m<sup>2</sup>/day, 30 min infusion days 3, 4, and 5; etoposide 150 mg/m<sup>2</sup>/day, 60 min infusion on days 6–8.

**HAM:** cytarabine 3 g/m<sup>2</sup>/dose, 3 h infusion every 12 h on days 1–3 (6 doses); mitoxantrone 10 mg/m<sup>2</sup>/day, 30 min infusion on days 3 and 4.

**Consolidation phases:**

**AI/2-CDA:** cytarabine 500 mg/m<sup>2</sup>/day, 96-h infusion on days 1–4; idarubicin 12 mg/m<sup>2</sup>/day, 30 min infusion on days 3 and 5; 2-chloro-2-deoxyadenosine 6 mg/m<sup>2</sup>/day, 30 min infusion, on days 1 and 3.

**AI:** cytarabine 500 mg/m<sup>2</sup>/day, 96-hours infusion on days 1–4; idarubicin 12 mg/m<sup>2</sup>/day, 30 min infusion on days 3 and 5.

**hAM:** cytarabine 1 g/m<sup>2</sup>/dose, 3 h infusion every 12 h on days 1–3 (6 doses); mitoxantrone 10 mg/m<sup>2</sup>/day, 30 min infusion on days 3 and 4.

**HAE:** cytarabine 3 g/m<sup>2</sup>/dose, 3 h infusion every 12 h on days 1–3 (6 doses); etoposide 125 mg/m<sup>2</sup>/day, 60 min infusion on days 2–5.

**Maintenance:**

AML-BFM 2012: daily thioguanine 40 mg/m<sup>2</sup>/day, orally; cytarabine 40 mg/m<sup>2</sup>/day, i.v. or s.c., 4 days every 4 weeks for 1 year.

**Table S1.** Stratification to risk group according to treatment protocols.

| Protocol                             | AML-BFM 2012 Registry                                                                                                                             | AML-BFM 2019                                                                                                                                                                                                                                                                                                                                                                                                                            |
|--------------------------------------|---------------------------------------------------------------------------------------------------------------------------------------------------|-----------------------------------------------------------------------------------------------------------------------------------------------------------------------------------------------------------------------------------------------------------------------------------------------------------------------------------------------------------------------------------------------------------------------------------------|
| <b>Standard risk group (SRG)</b>     | t(8;21), inv(16), t(1;11),<br>NPM1, CEBPdm <sup>a</sup>                                                                                           | Inv(16)(p13.1q22)<br>t(16;16)(p13;q22)<br>t(8;21)(q22;q22)<br>t(1;11) (q21;q23)<br>Normal karyotype and NPM1-<br>mutation<br>Normal karyotype and CEBPA<br>(double mutation) <sup>a</sup>                                                                                                                                                                                                                                               |
| <b>Intermediate risk group (IRG)</b> | All others <sup>b</sup>                                                                                                                           | All others <sup>b</sup>                                                                                                                                                                                                                                                                                                                                                                                                                 |
| <b>High risk group (HRG)</b>         | t(4;11), t(5;11), t(6;11),<br>t(10;11), t(6;9), t(7;12),<br>der12p, isolated<br>monosomy 7, t(9;22),<br>FLT3-ITD and WT1mut,<br>complex karyotype | 12p/ t(2;12), 5/5q,<br>FLT-ITD and WT1mut,<br>7 (not in combination with<br>favorable/MLL-aberrations),<br>t(4;11)(q21;q23); KMT2A::AF4,<br>t(5;11)(q35.3;p15);NUP98::NSD1,<br>t(6;11)(q27;q23);KMT2A::AF6,<br>t(10;11)(p12;q23);KMT2A::AF10,<br>t(6;9)(p23;q34), t(7;12)(q36;p13),<br>t(9;22)(q34;q11), complex karyotype,<br>inv(3)(q21q26.2)/t(3;3)(q21;q26.2),<br>t(16;21)(p11;q22);FUS::ERG,<br>Inv(16)(p13.3q24.3);CBFA2T3::GLIS2 |

<sup>a</sup> In case of bone marrow blasts >20% on the days 21-28—reclassification to IRG

<sup>b</sup> In case of bone marrow blasts > 20% on the days 21-28 or >5% on the days 42-56—reclassification to HRG
